# Supplementary material for: Polypseudorotaxane architecture of poly-bis[4-(N-benzyl- pyridinium)]piperazine-hexa-thiocyanato-di-cadmium(ii) with 2-D honeycomb-like [Cd(SCN)3]nn? anionic polymeric framework
Source: Royal Society of Chemistry journal article supplement (doi:10.1039/b701229b), 2007-01-01

Supporting materials:

The thermogravimetric behavior was analyzed by TGA (Perkin-Elmer PYRIS 1), with heating rate of 5<sup>o</sup>/min and sample masses of ~7 mg. In order to avoid pyrolysis,<sup>1</sup> the experiments were conducted in the flow of nitrogen.

1 B. Ptaszyński, E. Skiba and J. Krystek, *J. Therm. Anal. Cal.*, 2001, **65**, 231.

TGA of complex **3** under nitrogen:

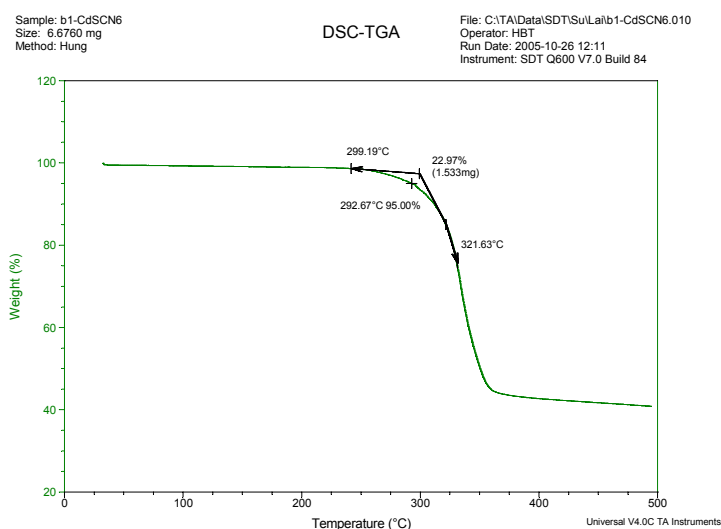

TGA of complex **4** under nitrogen:

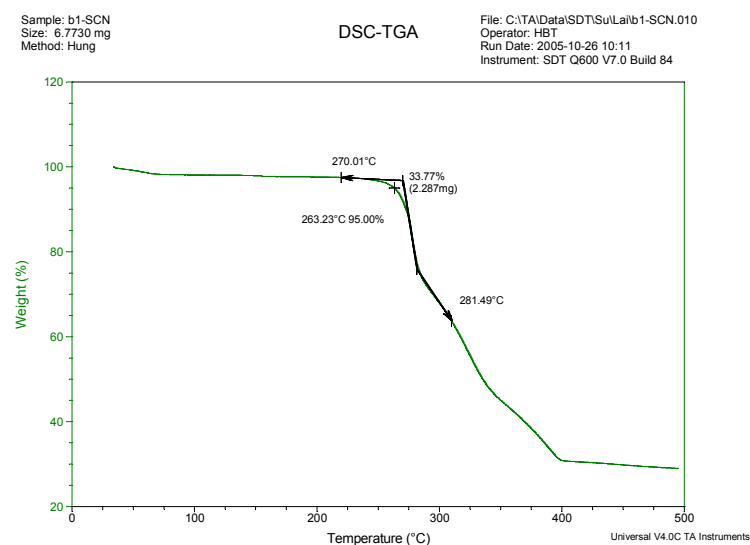

Electronic Supplementary Material for CrystEngComm  
This journal is © The Royal Society of Chemistry 2007  
ORTEP of hybrid **3** with 50% probability thermal ellipsoids

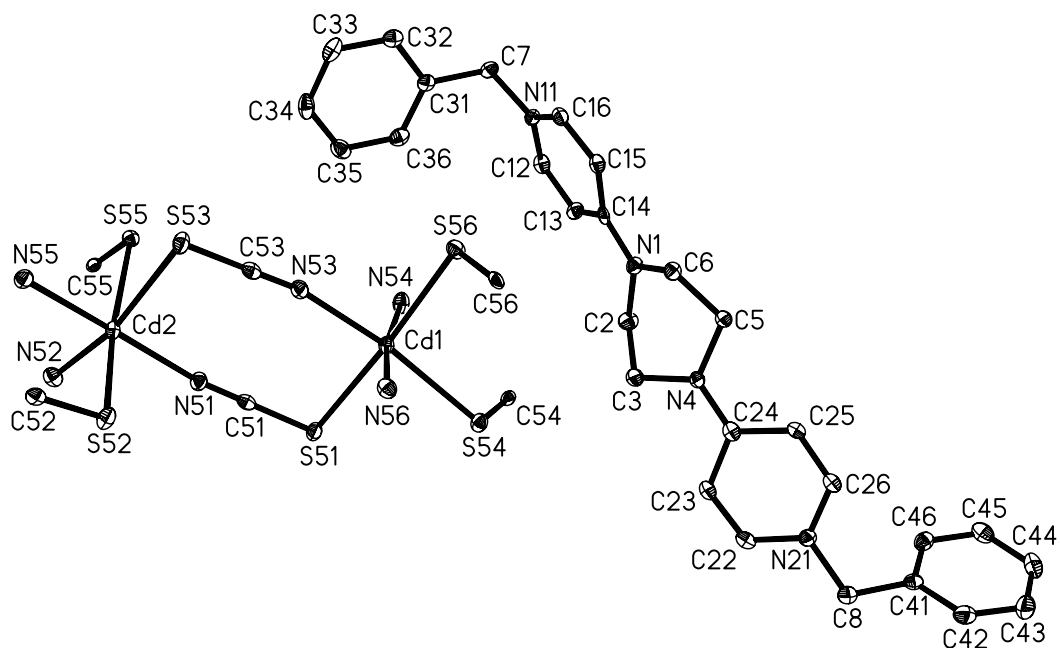

ORTEP of compound **4** with 50% probability thermal ellipsoids

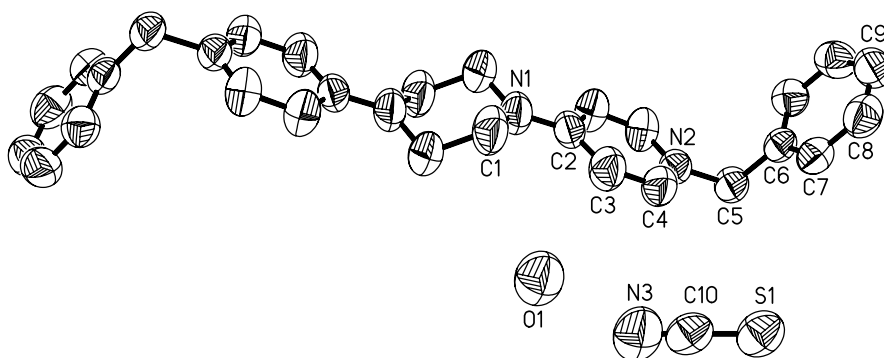

Supplement: b701229b.pdf [file b701229b.pdf]
